# Supplementary material
Source: publisher figshare collection journal article supplement (https://acs.figshare.com/ndownloader/files/3925159)
Supplement: Supplementary file 1 [file 3925159]

## Supporting Information

### Magnetically Induced Anisotropic Orientation of Graphene Oxide Locked by *in Situ* Hydrogelation

Linlin Wu,<sup>1</sup> Masataka Ohtani,<sup>2</sup> Masaki Takata,<sup>3</sup> Akinori Saeki,<sup>4</sup> Shu Seki,<sup>4</sup> Yasuhiro Ishida,<sup>2\*</sup> and  
Takuzo Aida<sup>1,2</sup>

<sup>1</sup> *Department of Chemistry and Biotechnology, School of Engineering, The University of Tokyo, 7-3-1 Hongo, Bunkyo-ku, Tokyo 113-8656, Japan*

<sup>2</sup> *RIKEN Center for Emergent Matter Science, 2-1 Hirosawa, Wako, Saitama 351-0198, Japan*

<sup>3</sup> *RIKEN SPring-8 Center, 1-1-1 Kouto, Sayo, Hyogo 679-5198, Japan*

<sup>4</sup> *Department of Applied Chemistry, Osaka University, 2-1 Yamadaoka, Suita, Osaka 565-0871, Japan*

#### Table of Contents

|                                                                                          |     |
|------------------------------------------------------------------------------------------|-----|
| 1. Estimation of Orientation Order Parameter .....                                       | S2  |
| 2. AFM and SEM Images of GO (Figure S1) .....                                            | S3  |
| 3. FT-IR Spectra of GO and Precursory Graphite (Figure S2) .....                         | S4  |
| 4. Raman Spectra of GO and Precursory Graphite (Figure S3) .....                         | S5  |
| 5. Energy Dispersion X-Ray Spectra of GO (Figure S4) .....                               | S6  |
| 6. 2D SAXS Images of GO-Hybridized Hydrogels                                             |     |
| 6-1. Effects of Gravitational Field (Figure S5) .....                                    | S7  |
| 6-2. Effects of Sample Shape Anisotropy (Figure S6) .....                                | S8  |
| 6-3. Effects of Magnetic Field Intensity (Figure S7) .....                               | S9  |
| 6-4. Effects of GO Concentration (Figure S8) .....                                       | S10 |
| 6-5. Effects of GO Size (Figure S9) .....                                                | S11 |
| 7. POM Images of GO-Hybridized Hydrogels after Magnetic Treatment (Figure S10) .....     | S12 |
| 8. SEM Images of the Xerogels of GO-Hybridized Hydrogels (Figure S11) .....              | S13 |
| 9. POM Images of Aqueous GO Dispersions (Figure S12) .....                               | S14 |
| 10. 2D SAXS Images of GO/RGO-Hybridized Hydrogels (Figure S13) .....                     | S15 |
| 11. POM Images of an RGO-Hybridized Hydrogel (Figure S14) .....                          | S16 |
| 12. Preparation of RGO-Hybridized Hydrogel by the Pre-Reduction Route (Figure S15) ..... | S17 |
| 13. 2D-SAXS Images of RGO-Hybridized Organo- and Ionogels (Figure S16) .....             | S18 |
| 14. Characterization of GO-Hybridized Organo- and Ionogels (Figure S17) .....            | S19 |
| 15. Supporting References .....                                                          | S20 |

## 1. Estimation of Orientation Order Parameter

The orientation order parameter ( $S$ ) was estimated using the azimuthal angle plots obtained from the 2D small-angle X-ray scattering (2D SAXS) images.<sup>S1,S2</sup> Scattering in 2D SAXS images at  $q = 0.08\text{--}0.44 \text{ nm}^{-1}$  were integrated for every  $5^\circ$  in azimuthal angle by using a Rigaku model R-Axis Display software. The  $S$  values range between 0 and 1, where the former corresponds to an isotropic structure and the latter corresponds to perfect orientation along the director. A Maier-Saupe distribution function (eq. 1) was used to fit the azimuthal angle plots<sup>S3</sup>

$$I = I_0 + A \exp(\alpha \cos^2(\varphi - \varphi_0)) \quad (1)$$

where  $I_0$  denotes the free baseline intensity,  $\varphi_0$  is the azimuth at the position of the maximal intensity,  $\varphi$  is the azimuth, and  $\alpha$  is the parameter that determines the width of the distribution. After the curve fitting of this function to the azimuthal angle plot, parameters  $I_0$ ,  $A$ , and  $\alpha$  were obtained. The orientation order parameter  $S$  was determined using the following equation<sup>S2</sup>

$$S = \frac{\int_{-1}^1 P_2(\cos \varphi) \exp(\alpha \cos^2 \varphi) d \cos \varphi}{\int_{-1}^1 \exp(\alpha \cos^2 \varphi) d \cos \varphi} \quad (2)$$

where the function  $P_2(\cos \varphi)$  is the second-order Legendre polynomial of  $\cos \varphi$ , often referred to as the Hermans orientation function.

$$P_2(\cos \varphi) = \frac{1}{2}(3 \cos^2 \varphi - 1) \quad (3)$$

## 2. AFM and SEM Images of GO

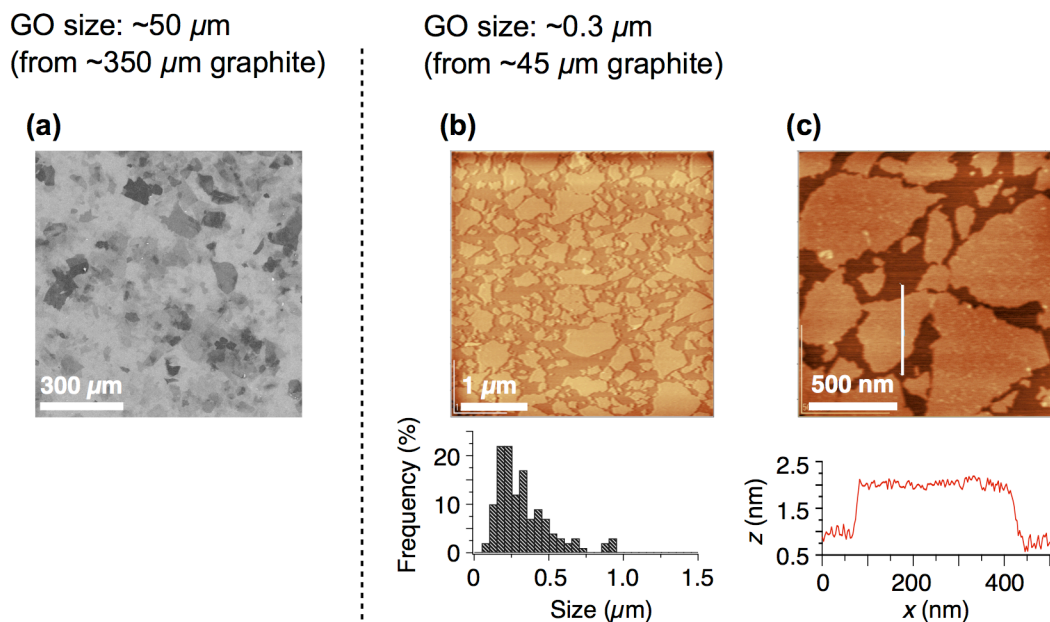

**Figure S1.** (a) SEM image of GO prepared from expandable graphite with the averaged size of  $\sim 350\ \mu\text{m}$ . (b,c) AFM images of GO prepared from graphite powder with the averaged size of  $\sim 45\ \mu\text{m}$ . Measurements were performed under tapping mode (phase imaging) in air with standard Si probes. Samples were prepared by spin-coating aqueous GO dispersions onto mica.

### 3. FT-IR Spectra of GO and Precursory Graphite

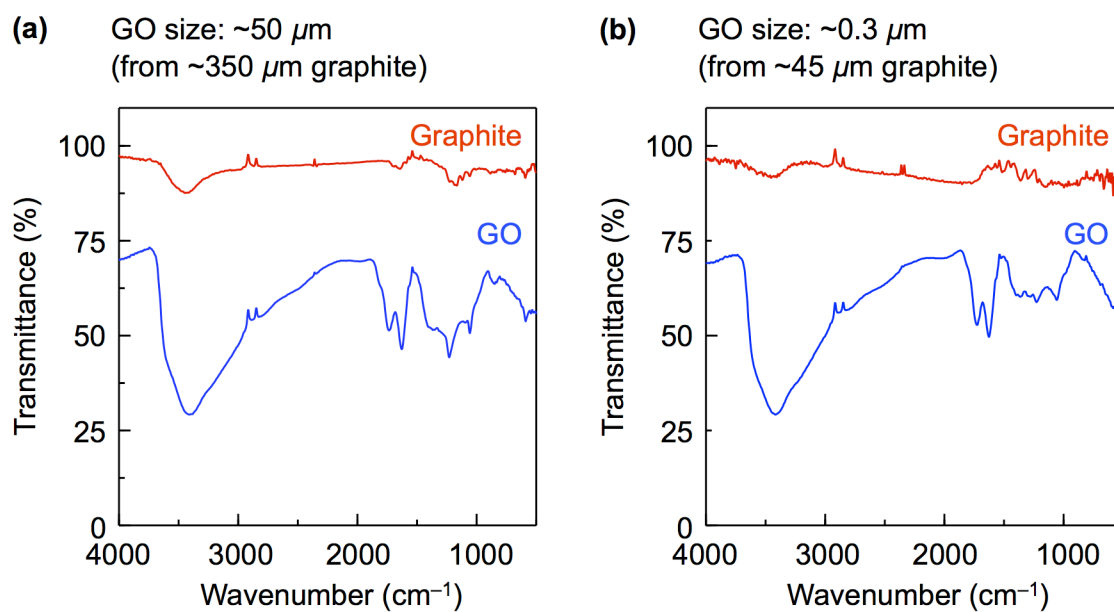

**Figure S2.** FT-IR spectra of GO (blue curve) and precursor graphite (red curve). Averaged sizes of GO/precursor graphite: (a)  $\sim 350/\sim 50\ \mu\text{m}$  and (b)  $\sim 45/\sim 0.3\ \mu\text{m}$ .



#### 4. Raman Spectra of GO and Precursory Graphite

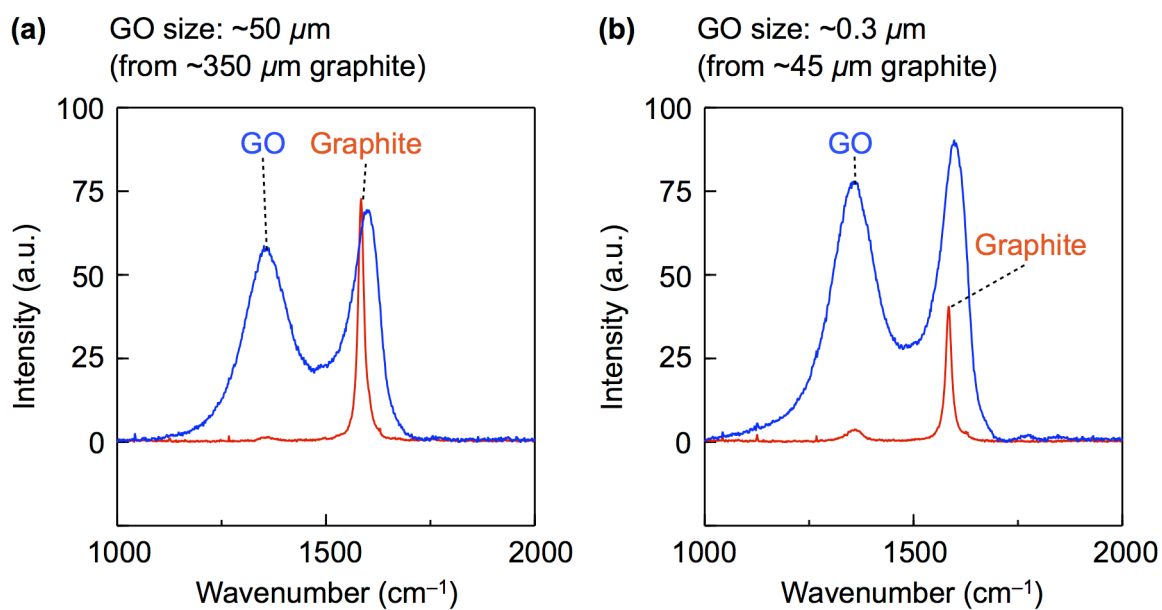

**Figure S3.** Raman spectra of GO (blue curve) and precursor graphite (red curve). Averaged sizes of GO/precursor graphite: (a)  $\sim 50/\sim 350 \mu\text{m}$  and (b)  $\sim 0.3/\sim 45 \mu\text{m}$ .

## 5. Energy Dispersion X-Ray Spectra of GO

(a) GO size:  $\sim 50\ \mu\text{m}$   
(from  $\sim 350\ \mu\text{m}$  graphite)

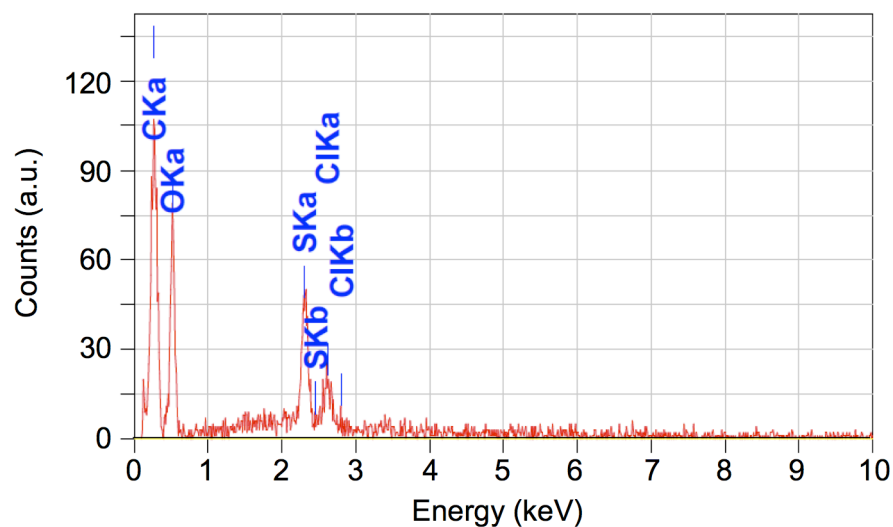

(b) GO size:  $\sim 0.3\ \mu\text{m}$   
(from  $\sim 45\ \mu\text{m}$  graphite)

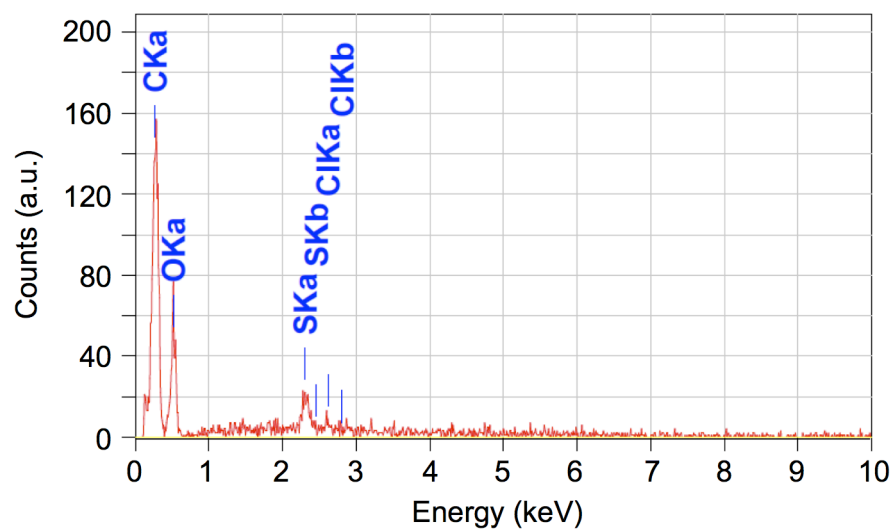

**Figure S4.** Energy dispersion X-ray spectra of GO samples. Averaged sizes of GO/precursor graphite: (a)  $\sim 50/\sim 350\ \mu\text{m}$  and (b)  $\sim 0.3/\sim 45\ \mu\text{m}$ .

## 6. 2D SAXS Images of GO-Hybridized Hydrogels

### 6-1. Effects of Gravitational Field

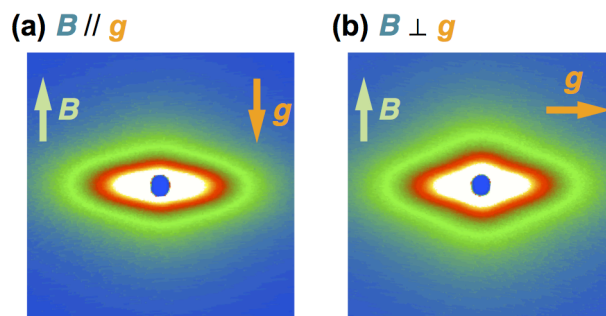

**Figure S5.** 2D-SAXS images of GO-hybridized hydrogels (GO/monomer/crosslinker = 0.20/3.0/0.16 wt%) prepared in a 10-T magnetic field directed (a) parallel and (b) orthogonal to the gravity. The hydrogels were exposed to an X-ray beam from the orthogonal direction to the magnetic field applied in the preparation of the GO-hybridized hydrogels.  $\mathbf{B}$ : magnetic field.  $\mathbf{g}$ : gravitational field.

## 6-2. Effects of Sample Shape Anisotropy

(a)  $B \parallel$  Film surface

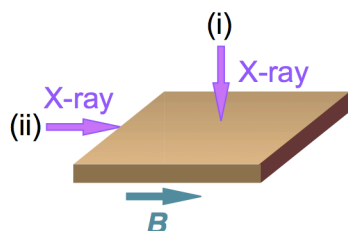

(i) Through view

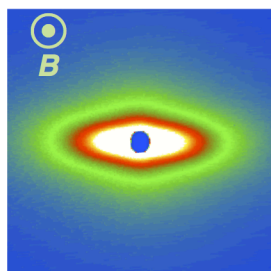

(ii) Edge view

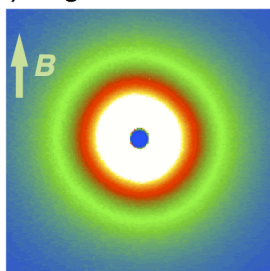

(b)  $B \perp$  Film surface

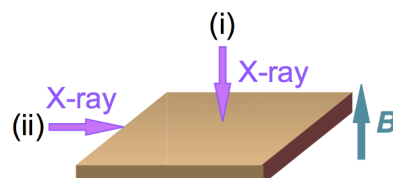

(i) Through view

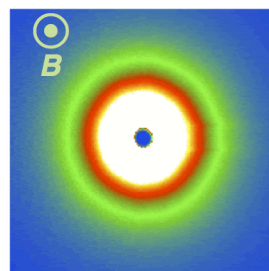

(ii) Edge view

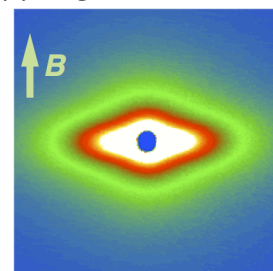

**Figure S6.** 2D-SAXS images of GO-hybridized hydrogel films (1-mm thick, 10-mm  $\times$  20-mm width, GO/monomer/crosslinker = 0.20/3.0/0.16 wt%) prepared in a 10-T magnetic field directed (a) parallel and (b) orthogonal to the film surface. The hydrogels were exposed to an X-ray beam from (i) the parallel and (ii) orthogonal directions to the film surface. In (a-ii), the X-ray was parallel to the to the magnetic field applied in the preparation of the GO-hybridized hydrogels.

### 6-3. Effects of Magnetic Field Intensity

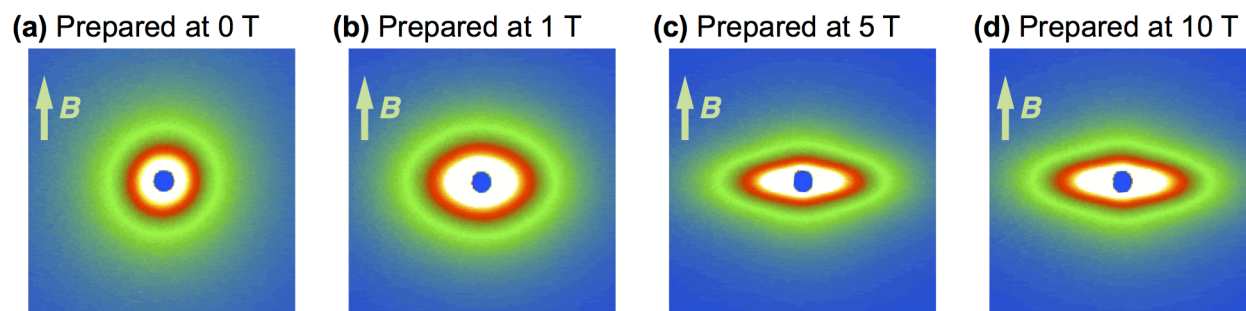

**Figure S7.** 2D-SAXS images of GO-hybridized hydrogels (GO/monomer/crosslinker = 0.20/3.0/0.16 wt%) prepared in a magnetic field with varying intensity: (a) 0, (b) 1, (c) 5, and (d) 10 T. The hydrogels were exposed to an X-ray beam from the orthogonal direction to the magnetic field applied in the preparation of the GO-hybridized hydrogels.

#### 6.4. Effects of GO Concentration

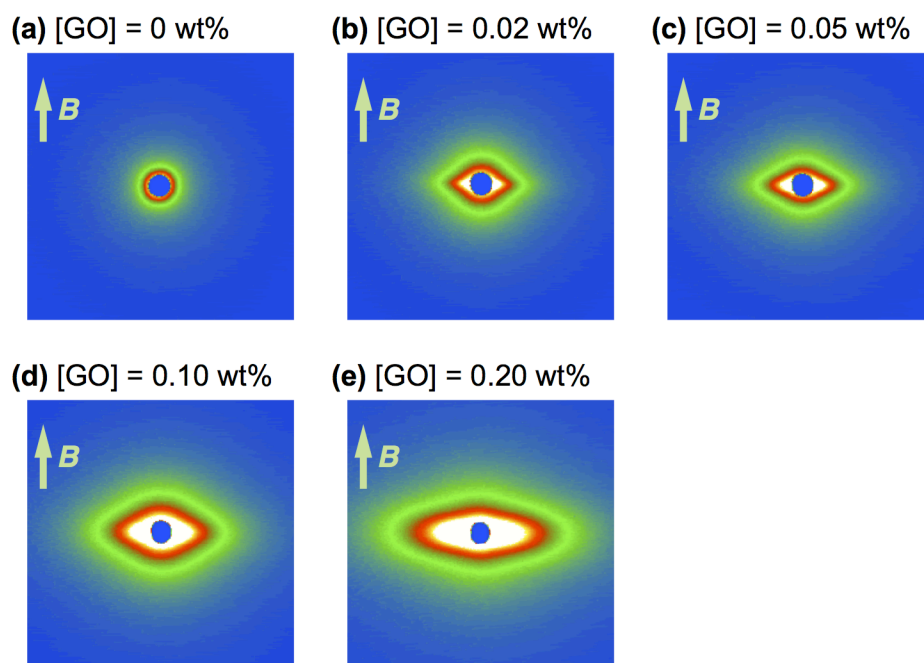

**Figure S8.** 2D-SAXS images of GO-hybridized hydrogels (monomer/crosslinker = 3.0/0.16 wt%, prepared in a 10-T magnetic field) with various GO concentrations: (a) 0, (b) 0.02, (c) 0.05, (d) 0.10, and (e) 0.20 wt%. The hydrogels were exposed to an X-ray beam from the orthogonal direction to the magnetic field applied in the preparation of the GO-free and GO-hybridized hydrogels.

## 6.5. Effects of GO Size

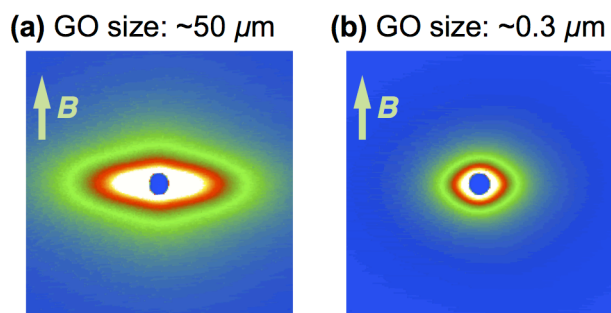

**Figure S9.** 2D-SAXS images of GO-hybridized hydrogels (GO/monomer/crosslinker = 0.10/3.0/0.16 wt%, prepared in a 10-T magnetic field) with averaged GO sizes of (a)  $\sim 50$  and (b)  $\sim 0.3 \mu\text{m}$ . The hydrogels were exposed to an X-ray beam from the orthogonal direction to the magnetic field applied in the preparation of the GO-hybridized hydrogels.

## 7. POM Images of GO-Hybridized Hydrogels after Magnetic Treatment

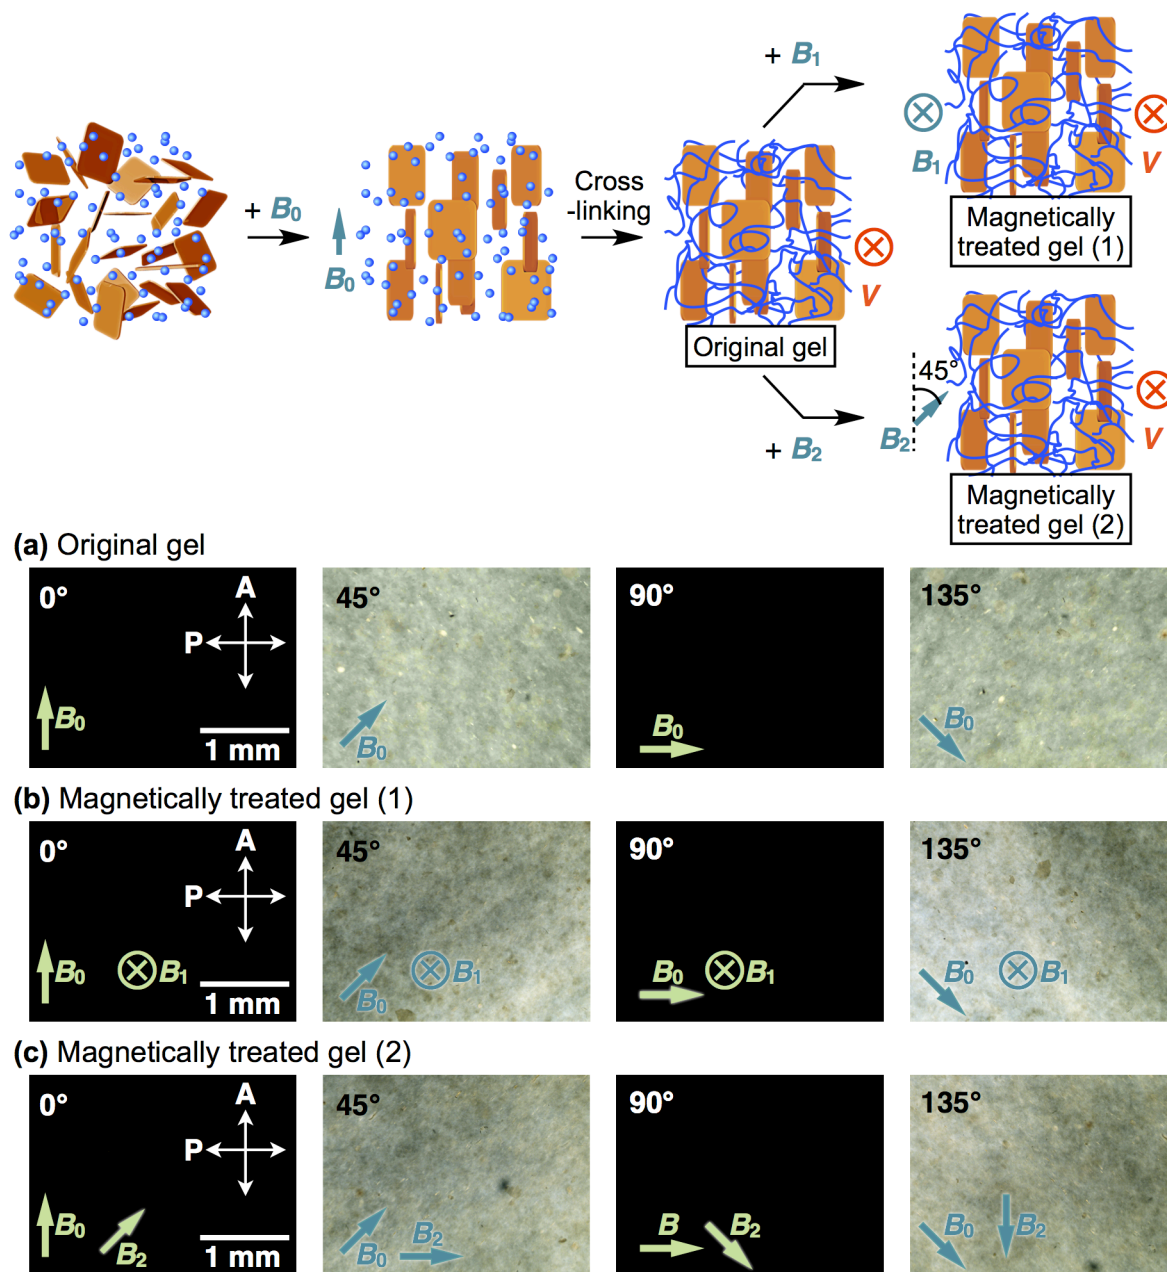

**Figure S10.** POM images of GO-hybridized hydrogels (1-mm thick, GO/monomer/crosslinker = 0.20/3.0/0.16 wt%, prepared in a 10-T magnetic field [ $B_0$ ]), where the viewing direction ( $V$ ) was orthogonal to  $B_0$ : (a) original and (b,c) after being treated at 20 °C for 48 h with 10-T magnetic fields directed parallel (b;  $B_1$ ) and orthogonal (c;  $B_2$ ) to  $V$ . In (c), the crossing angle between  $B_0$  and  $B_2$  was  $45^\circ$ . The images were obtained by varying the angle between the direction of the analyzer and that of the applied magnetic field ( $0^\circ$ ,  $45^\circ$ ,  $90^\circ$ , and  $135^\circ$ ).



## 8. SEM Images of the Xerogels of GO-Hybridized Hydrogels

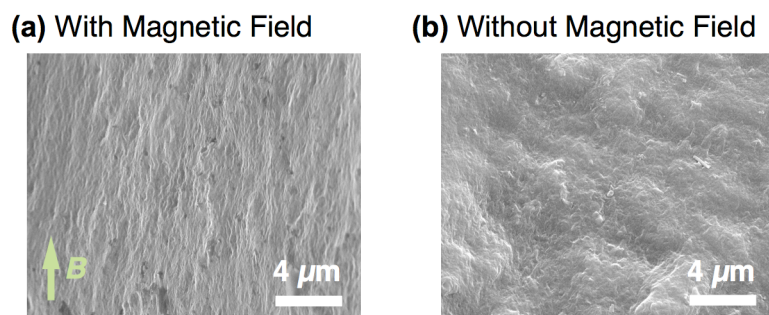

**Figure S11.** SEM images of the xerogels of GO-hybridized hydrogels (GO/monomer/crosslinker = 0.20/3.0/0.16 wt%) prepared (a) in a 10-T magnetic field and (b) without magnetic field.

## 9. POM Images of Aqueous GO Dispersions

(a) GO size:  $\sim 50\ \mu\text{m}$

[GO] = 0.02 wt%

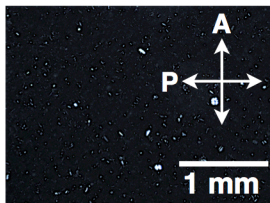

[GO] = 0.05 wt%

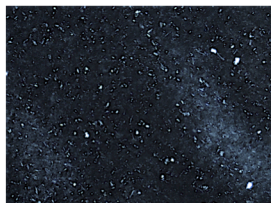

[GO] = 0.10 wt%

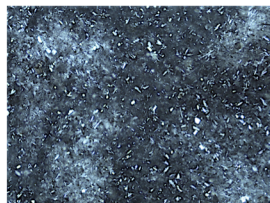

[GO] = 0.20 wt%

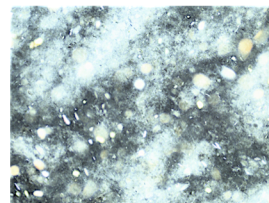

(b) GO size:  $\sim 0.3\ \mu\text{m}$

[GO] = 0.02 wt%

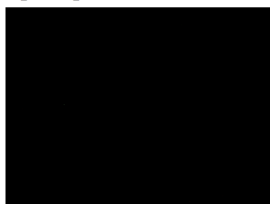

[GO] = 0.05 wt%

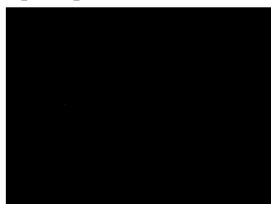

[GO] = 0.10 wt%

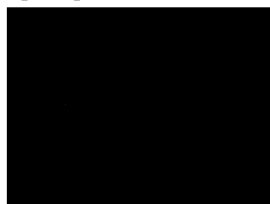

[GO] = 0.20 wt%

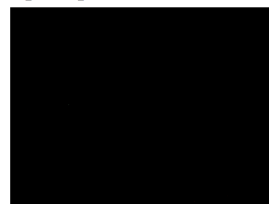

**Figure S12.** POM images of aqueous dispersions (in 1-mm cell) of GO with the averaged sizes of (a)  $\sim 50$  and (b)  $\sim 0.3\ \mu\text{m}$ . [GO] = (i) 0.02, (ii) 0.05, (iii) 0.10, and (iv) 0.20 wt%.

## 10. 2D SAXS Images of GO/RGO-Hybridized Hydrogels

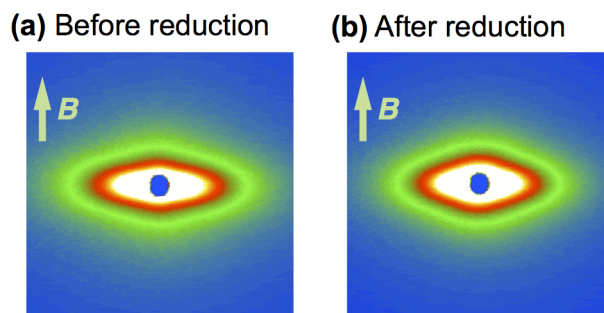

**Figure S13.** 2D-SAXS images of GO/RGO-hybridized hydrogels: (a) a GO-hybridized hydrogel (GO/monomer/crosslinker = 0.20/3.0/0.16 wt%, prepared in a 10-T magnetic field) and (b) a RGO-hybridized hydrogel prepared by the chemical reduction of GO in the GO-hybridized hydrogel. The hydrogels were exposed to an X-ray beam from the orthogonal direction to the magnetic field applied in the preparation of the GO-hybridized hydrogel.

## 11. POM Images of an RGO-Hybridized Hydrogel

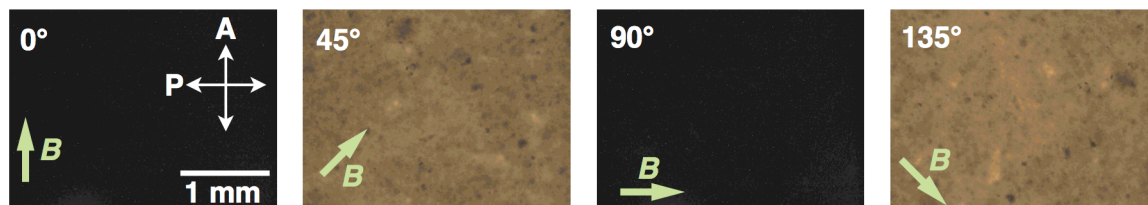

**Figure S14.** POM images of an RGO-hybridized hydrogel (1-mm thick) prepared by the chemical reduction of GO in a GO-hybridized hydrogel (GO/monomer/crosslinker = 0.20/3.0/0.16 wt%, prepared in a 10-T magnetic field). The images were obtained by varying the angle between the direction of the analyzer and that of the applied magnetic field (0°, 45°, 90°, and 135°).

## 12. Preparation of RGO-Hybridized Hydrogel by the Pre-Reduction Route

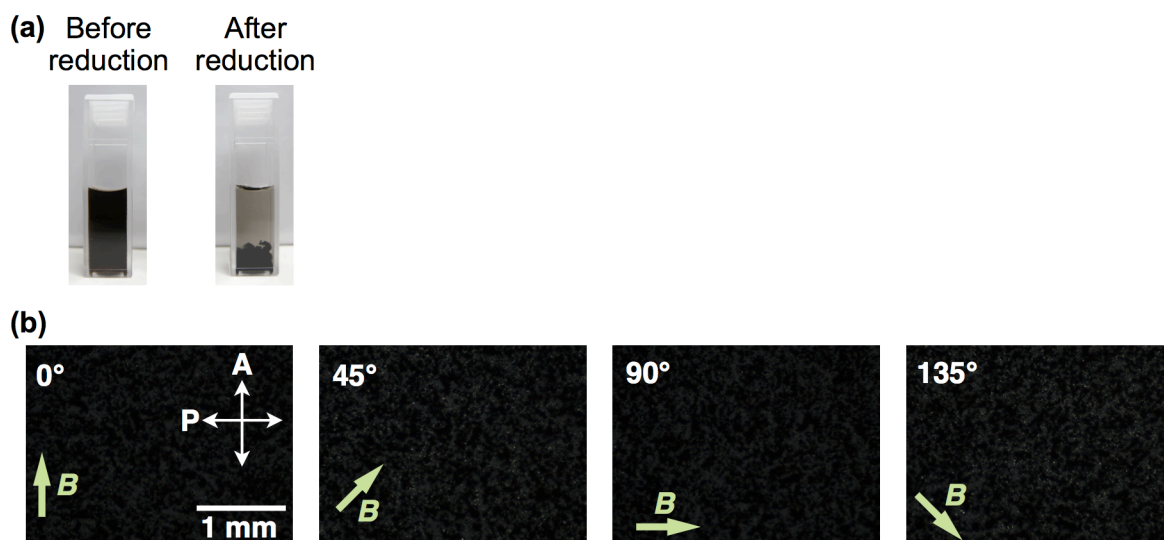

**Figure S15.** (a) Pictures of an aqueous mixture of GO ( $[\text{GO}]_0 = 0.20 \text{ wt\%}$ ) before (left) and after (right) the treatment with reducing agents ( $[\text{KOH}]_0 = 1.6 \text{ M}$ ,  $[\text{HI}]_0 = 55\%$ ) at  $20^\circ \text{C}$ . (b) POM images of an RGO-hybridized hydrogel (1-mm thick) prepared with the above mixture by in situ crosslinking polymerization of an acryl monomer (*N,N*-dimethylacrylamide, 3.0 wt%) and a crosslinker (*N,N'*-methylenebis(acrylamide), 0.16 wt%) in a 10-T magnetic field. The images were obtained by varying the angle between the direction of the analyzer and that of the applied magnetic field ( $0^\circ$ ,  $45^\circ$ ,  $90^\circ$ , and  $135^\circ$ ).

### 13. 2D-SAXS Images of RGO-Hybridized Organo- and Ionogels

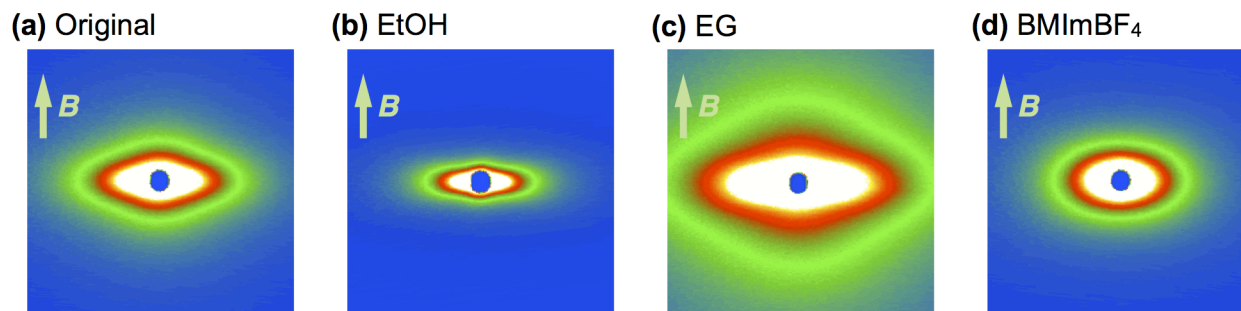

**Figure S16.** 2D-SAXS images of RGO-hybridized gels. An RGO-hybridized hydrogel was prepared by the chemical reduction of GO in a GO-hybridized hydrogel (GO/monomer/crosslinker = 0.20/3.0/0.16 wt%, prepared in a 10-T magnetic field). The RGO-hybridized hydrogel was immersed at 20 °C for 12 h three times in a fresh solvent (1,000 vol%): (a) original hydrogel and gels after immersion in (b) ethanol (EtOH), (c) ethylene glycol (EG), and (d) 1-butyl-4-methylimidazolium tetrafluoroborate (BMImBF<sub>4</sub>). The gels were exposed to an X-ray beam from the orthogonal direction to the magnetic field applied in the preparation of the GO-hybridized hydrogel.

## 14. Characterization of GO-Hybridized Organo- and Ionogels

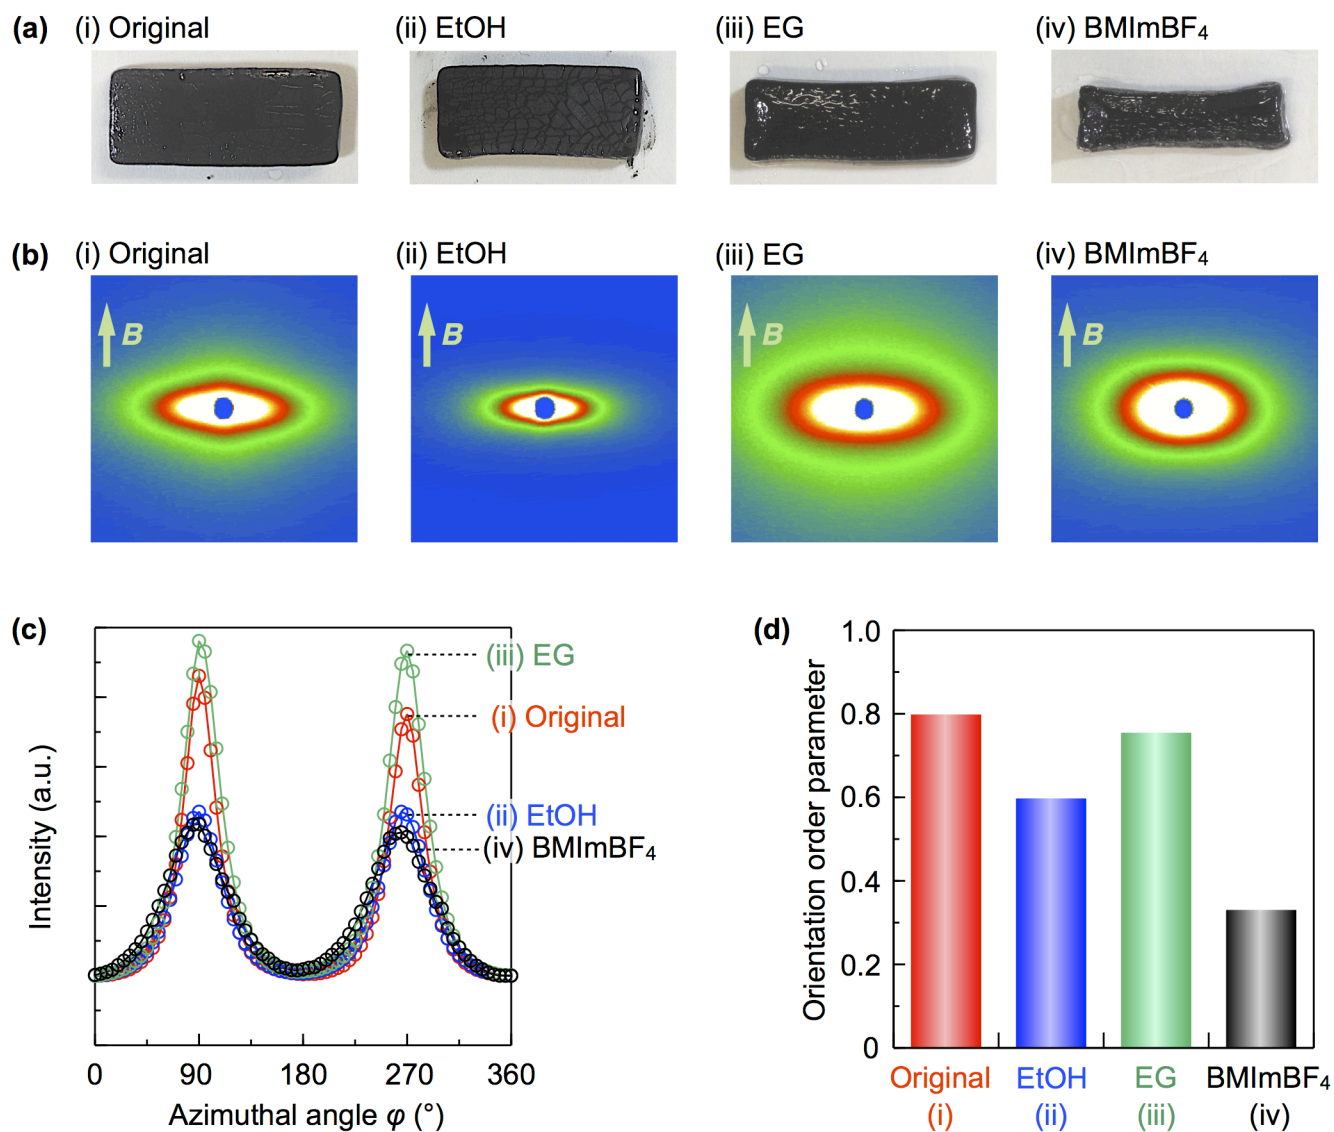

**Figure S17.** (a) Pictures (5-mm thick), (b) 2D-SAXS images, (c) azimuthal angle plots for the 2D-SAXS images, and (d) orientation order parameters of GO-hybridized gels. A GO-hybridized hydrogel (GO/monomer/crosslinker = 0.20/3.0/0.16 wt%, prepared in a 10-T magnetic field) was immersed in: (i) original hydrogel and gels after immersion in (ii) EtOH, (iii) EG, and (iv) BMImBF<sub>4</sub>. In (b), the gels were exposed to an X-ray beam from the orthogonal direction to the magnetic field applied in the preparation of the GO-hybridized hydrogel.

## 15. Supporting References

- S1. Feng, S.; Xiong, X.; Zhang, G.; Xia, N.; Chen, Y.; Wang, W. Hierarchical Structure in Oriented Fibers of a Dendronized Polymer. *Macromolecules* **2009**, *42*, 281–287.
- S2. Nie, Y. J.; Huang, G. S.; Qu, L. L.; Wang, X.; Weng, G. S.; Wu, J. R. New Insights into Thermodynamic Description of Strain-Induced Crystallization of Peroxide Cross-Linked Natural Rubber Filled with Clay by Tube Model. *Polymer* **2011**, *52*, 3234–3242.
- S3. Mitchell, G. R. In *Comprehensive Polymer Science*; Allen, G. and Bevington, J. C. Eds.; Pergamon Press: Oxford, 1989; Vol. 1.
